# Supplementary material for: Penidihydrocitrinins A–C: New Polyketides from the Deep-Sea-Derived Penicillium citrinum W17 and Their Anti-Inflammatory and Anti-Osteoporotic Bioactivities
Source: MDPI journal article supplement (doi:10.3390/md21100538), 2023-10-14
Supplement: s1 [file s1]

# Supporting Information

## Penidihydrocitrinins A–C: New Polyketides from the Deep-Sea-Derived *Penicillium citrinum* W17 and Their Anti-Inflammatory and Anti-osteoporotic Bioactivities

Yong Zhang <sup>1,†</sup>, Chun-Lan Xie <sup>1,2,†</sup>, Yuan Wang <sup>1</sup>, Xi-Wen He <sup>1</sup>, Ming-Min Xie <sup>1</sup>, You Li <sup>1</sup>, Kai Zhang <sup>1</sup>, Zheng-Biao Zou <sup>1</sup>, Long-He Yang <sup>1,\*</sup>, Ren Xu <sup>2,\*</sup>, and Xian-Wen Yang <sup>1,\*</sup>

<sup>1</sup> Key Laboratory of Marine Genetic Resources, Technical Innovation Center for Utilization of Marine Biological Resources, Third Institute of Oceanography, Ministry of Natural Resources, 184 Daxue Road, Xiamen 361005, China

<sup>2</sup> School of Medicine, Xiamen University, South Xiang'an Road, Xiamen 361005, China

\* Correspondence: yangxianwen@tio.org.cn (X.-W.Y.); xuren526@xmu.edu.cn (R.X.); longheyang@tio.org.cn (L.Y.); Tel.: +86-592-219-5319 (X.-W.Y.); +86-592-288-0577 (R.X.); +86-592-219-5319 (L.Y.)

† These authors contributed equally to this work.

### Content

**Figure S1.** The HR-ESI-MS of compound **1**.

**Figure S2.** The <sup>1</sup>H NMR spectrum of compound **1** in CD<sub>3</sub>OD.

**Figure S3.** The <sup>13</sup>C NMR spectrum of compound **1** in CD<sub>3</sub>OD.

**Figure S4.** The HSQC spectrum of compound **1** in CD<sub>3</sub>OD.

**Figure S5.** The <sup>1</sup>H-<sup>1</sup>H COSY spectrum of compound **1** in CD<sub>3</sub>OD.

**Figure S6.** The HMBC spectrum of compound **1** in CD<sub>3</sub>OD.

**Figure S7.** The NOESY spectrum of compound **1** in CD<sub>3</sub>OD.

**Figure S8.** The HR-ESI-MS of compound **2**.

**Figure S9.** The <sup>1</sup>H NMR spectrum of compound **2** in DMSO-*d*<sub>6</sub>.

**Figure S10.** The <sup>13</sup>C NMR spectrum of compound **2** in DMSO-*d*<sub>6</sub>.

**Figure S11.** The HSQC spectrum of compound **2** in DMSO-*d*<sub>6</sub>.

**Figure S12.** The <sup>1</sup>H-<sup>1</sup>H COSY spectrum of compound **2** in DMSO-*d*<sub>6</sub>.

**Figure S13.** The HMBC spectrum of compound **2** in DMSO-*d*<sub>6</sub>.

**Figure S14.** The NOESY spectrum of compound **2** in DMSO-*d*<sub>6</sub>.

**Figure S15.** The HR-ESI-MS of compound **3**.

**Figure S16.** The <sup>1</sup>H NMR spectrum of compound **3** in DMSO-*d*<sub>6</sub>.

**Figure S17.** The <sup>13</sup>C NMR spectrum of compound **3** in DMSO-*d*<sub>6</sub>.

**Figure S18.** The HSQC spectrum of compound **3** in DMSO-*d*<sub>6</sub>.

**Figure S19.** The <sup>1</sup>H-<sup>1</sup>H COSY spectrum of compound **3** in DMSO-*d*<sub>6</sub>.

**Figure S20.** The HMBC spectrum of compound **3** in DMSO-*d*<sub>6</sub>.

**Figure S21.** The NOESY spectrum of compound **3** in DMSO-*d*<sub>6</sub>.

## Elemental Composition Report

Page 1

Tolerance = 5.0 mDa / DBE: min = -1.5, max = 50.0

Element prediction: Off

Number of isotope peaks used for i-FIT = 3

Monoisotopic Mass, Even Electron Ions

105 formula(e) evaluated with 3 results within limits (up to 50 best isotopic matches for each mass)

Elements Used:

C: 0-35 H: 0-50 O: 0-15 <sup>23</sup>Na: 0-1

ZYA 5-2-N 86 (0.347) Cm (75:109)

1: TOF MS ES-

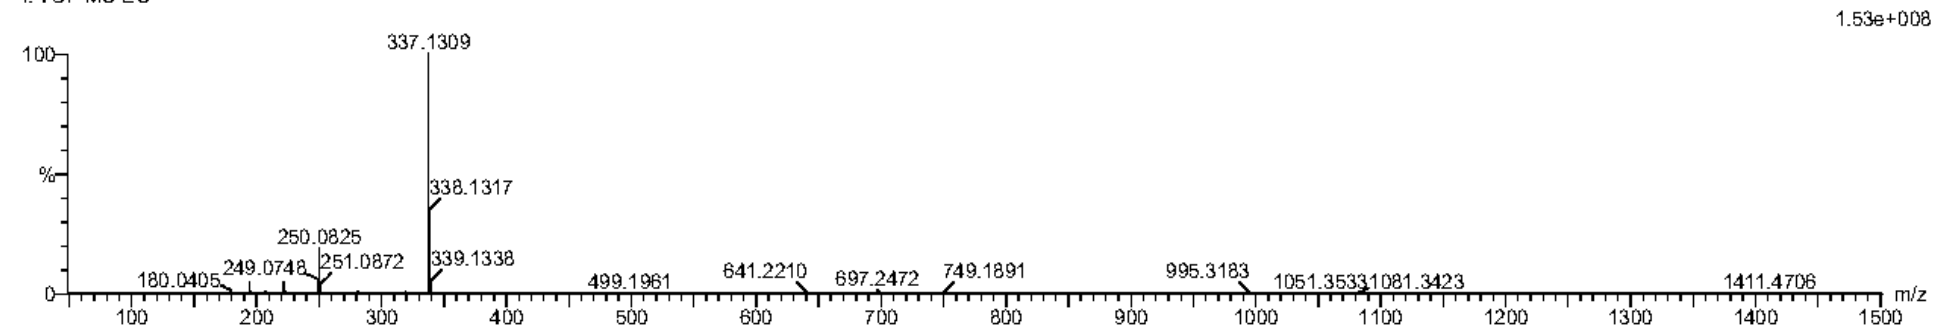

Minimum: 80.00  
Maximum: 100.00

| Mass     | RA     | Calc. Mass | mDa  | PPM   | DBE  | i-FIT  | Norm  | Conf (%) | Formula                     |
|----------|--------|------------|------|-------|------|--------|-------|----------|-----------------------------|
| 337.1309 | 100.00 | 337.1287   | 2.2  | 6.5   | 7.5  | 2059.9 | 0.584 | 55.77    | C17 H21 O7                  |
|          |        | 337.1263   | 4.6  | 13.6  | 4.5  | 2060.5 | 1.170 | 31.05    | C15 H22 O7 <sup>23</sup> Na |
|          |        | 337.1346   | -3.7 | -11.0 | -1.5 | 2061.3 | 2.026 | 13.18    | C10 H25 O12                 |

**Figure S1.** The HR-ESI-MS of compound **1**.

ZYA 5-2 M 5.7mg H

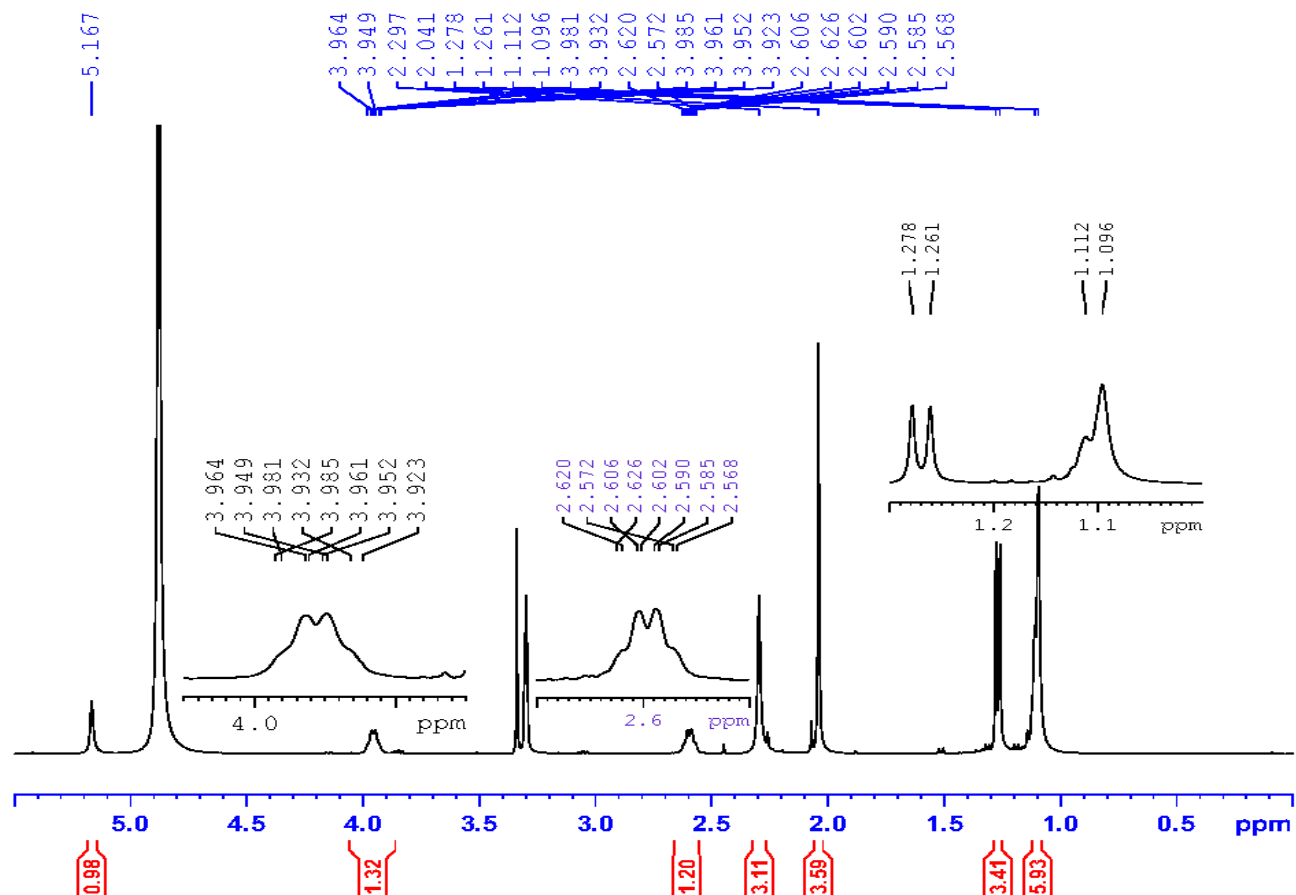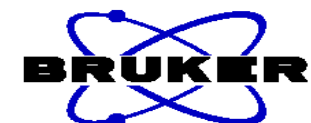

NAME ZYA 5-2 M 5.7mg  
EXPNO 1  
PROCNO 1  
Date\_ 20220109  
Time\_ 15.40  
INSTRUM spect  
PROBHD 5 mm PABBO BB-  
PULPROG zg30  
TD 65536  
SOLVENT MeOD  
NS 16  
DS 2  
SWH 8012.820 Hz  
FIDRES 0.122266 Hz  
AQ 4.0894966 sec  
RG 203  
DW 62.400 usec  
DE 6.50 usec  
TE 295.3 K  
D1 1.00000000 sec  
TD0 1

----- CHANNEL f1 -----  
SF01 400.1324710 MHz  
NUC1 1H  
P1 13.90 usec  
SI 65536  
SF 400.1300115 MHz  
WDW EM  
SSB 0  
LB 0.30 Hz  
GB 0  
PC 1.00

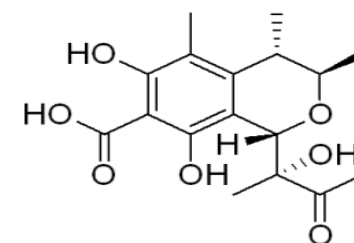

Figure S2. The  $^1\text{H}$  NMR spectrum of compound **1** in  $\text{CD}_3\text{OD}$ .

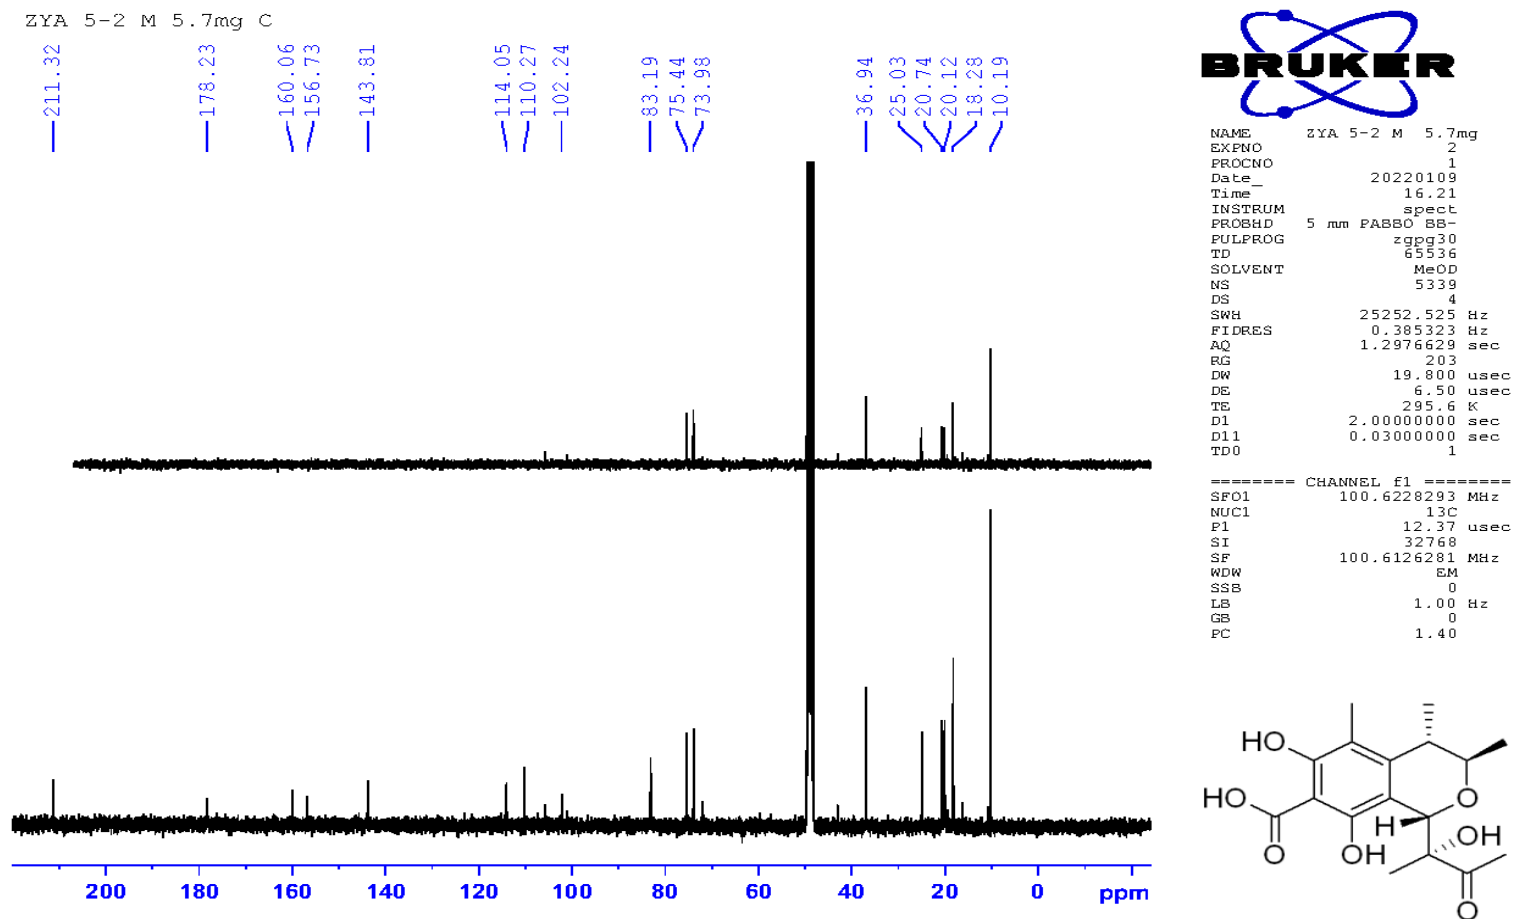

**Figure S3.** The  $^{13}\text{C}$  NMR spectrum of compound **1** in  $\text{CD}_3\text{OD}$ .

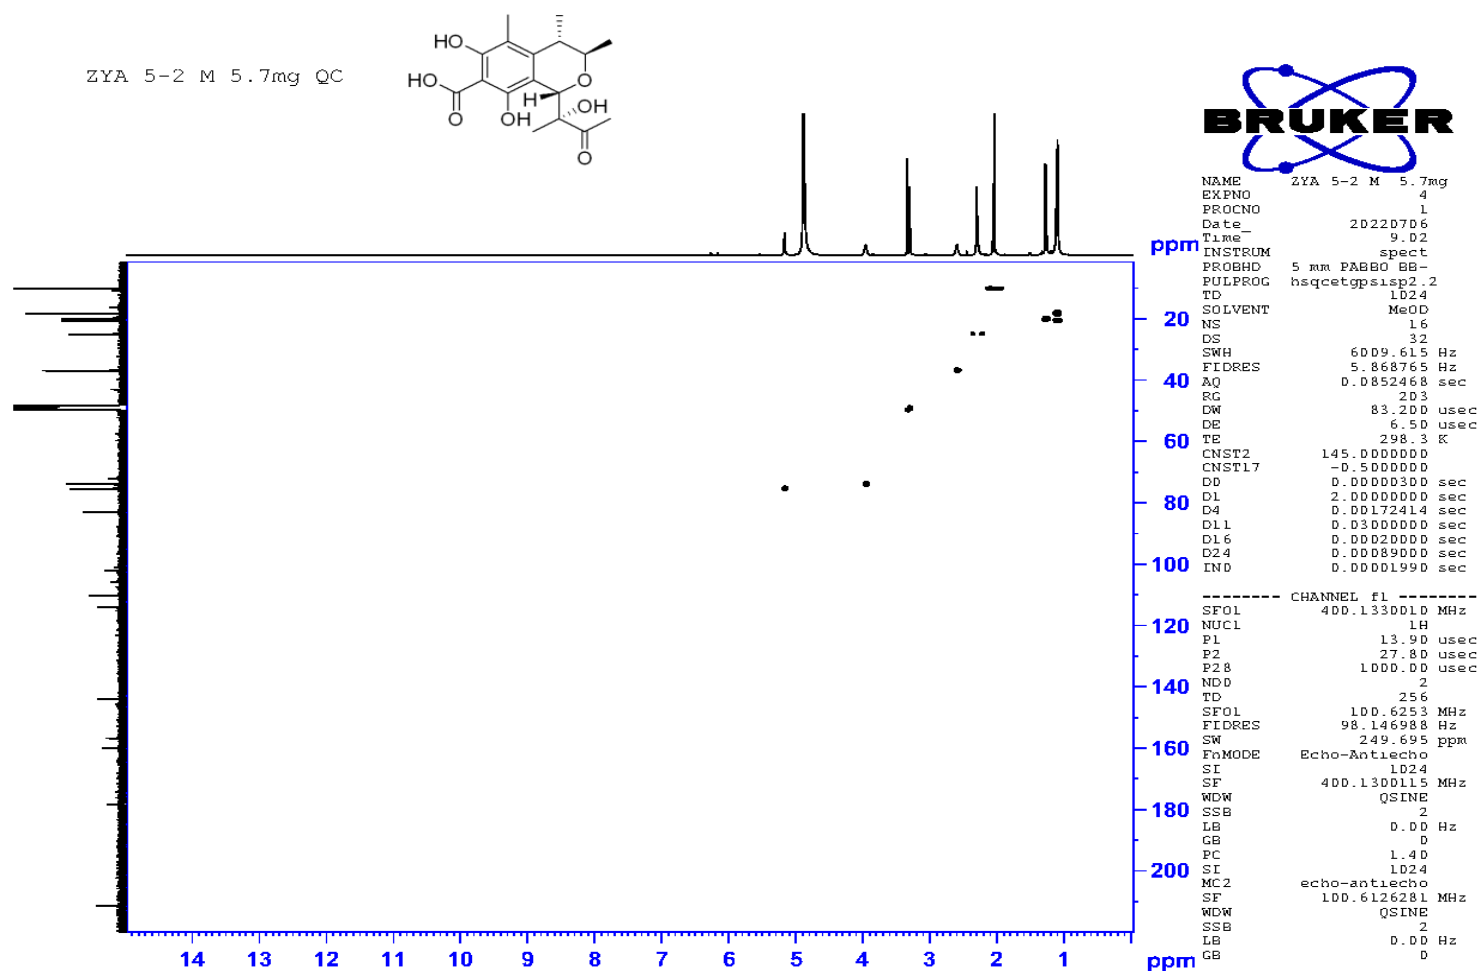

**Figure S4.** The HSQC spectrum of compound **1** in CD<sub>3</sub>OD.

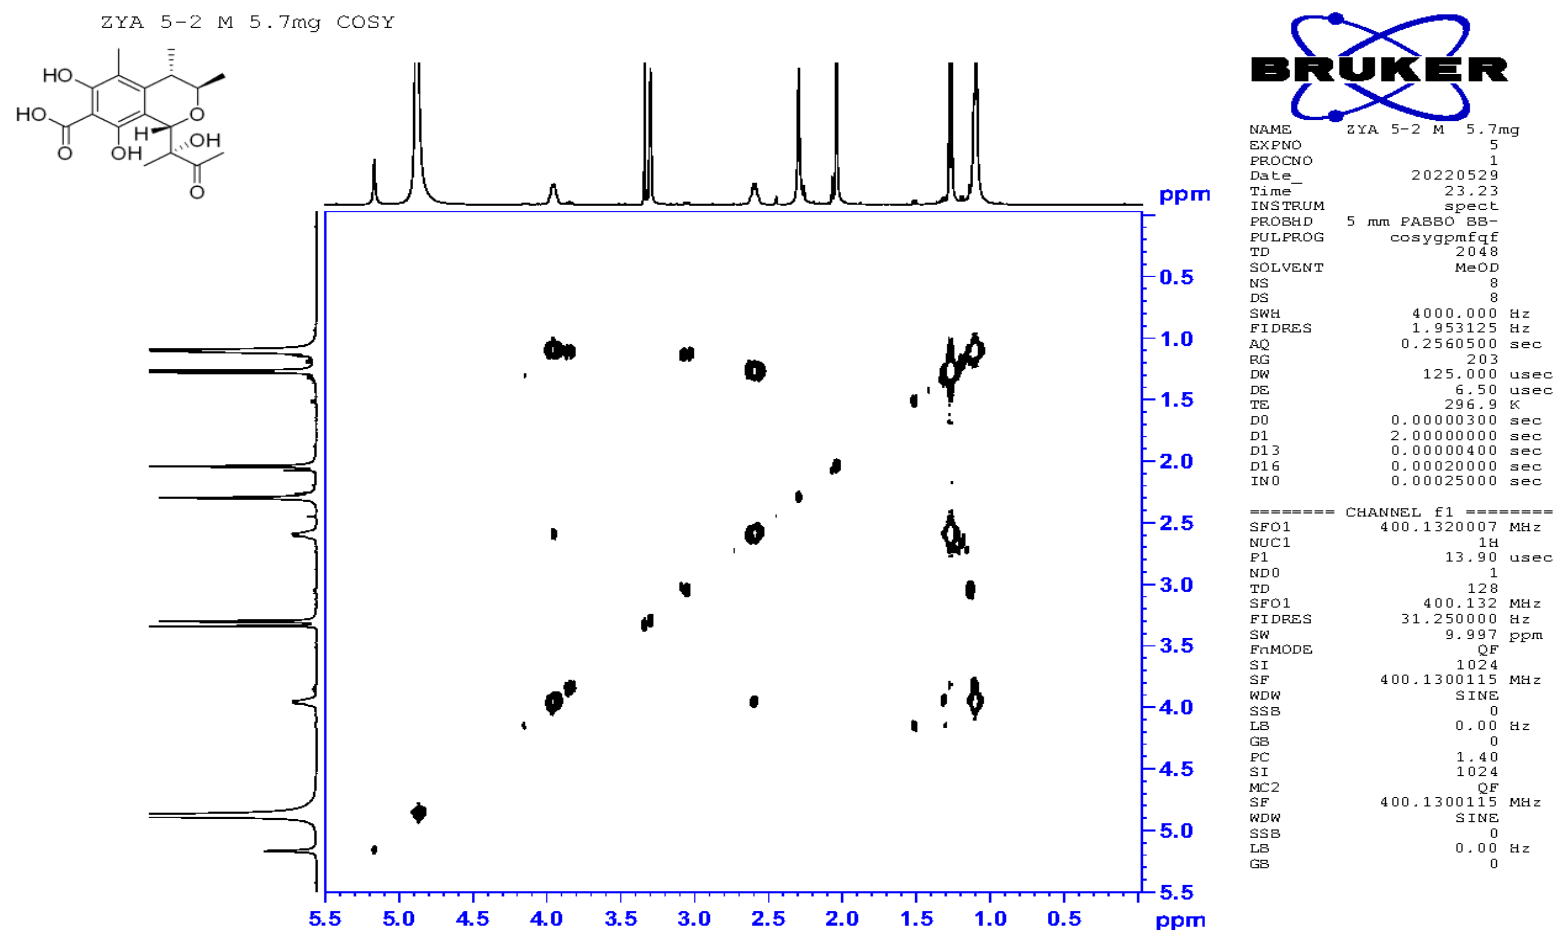

**Figure S5.** The  $^1\text{H}$ - $^1\text{H}$  COSY spectrum of compound **1** in  $\text{CD}_3\text{OD}$ .

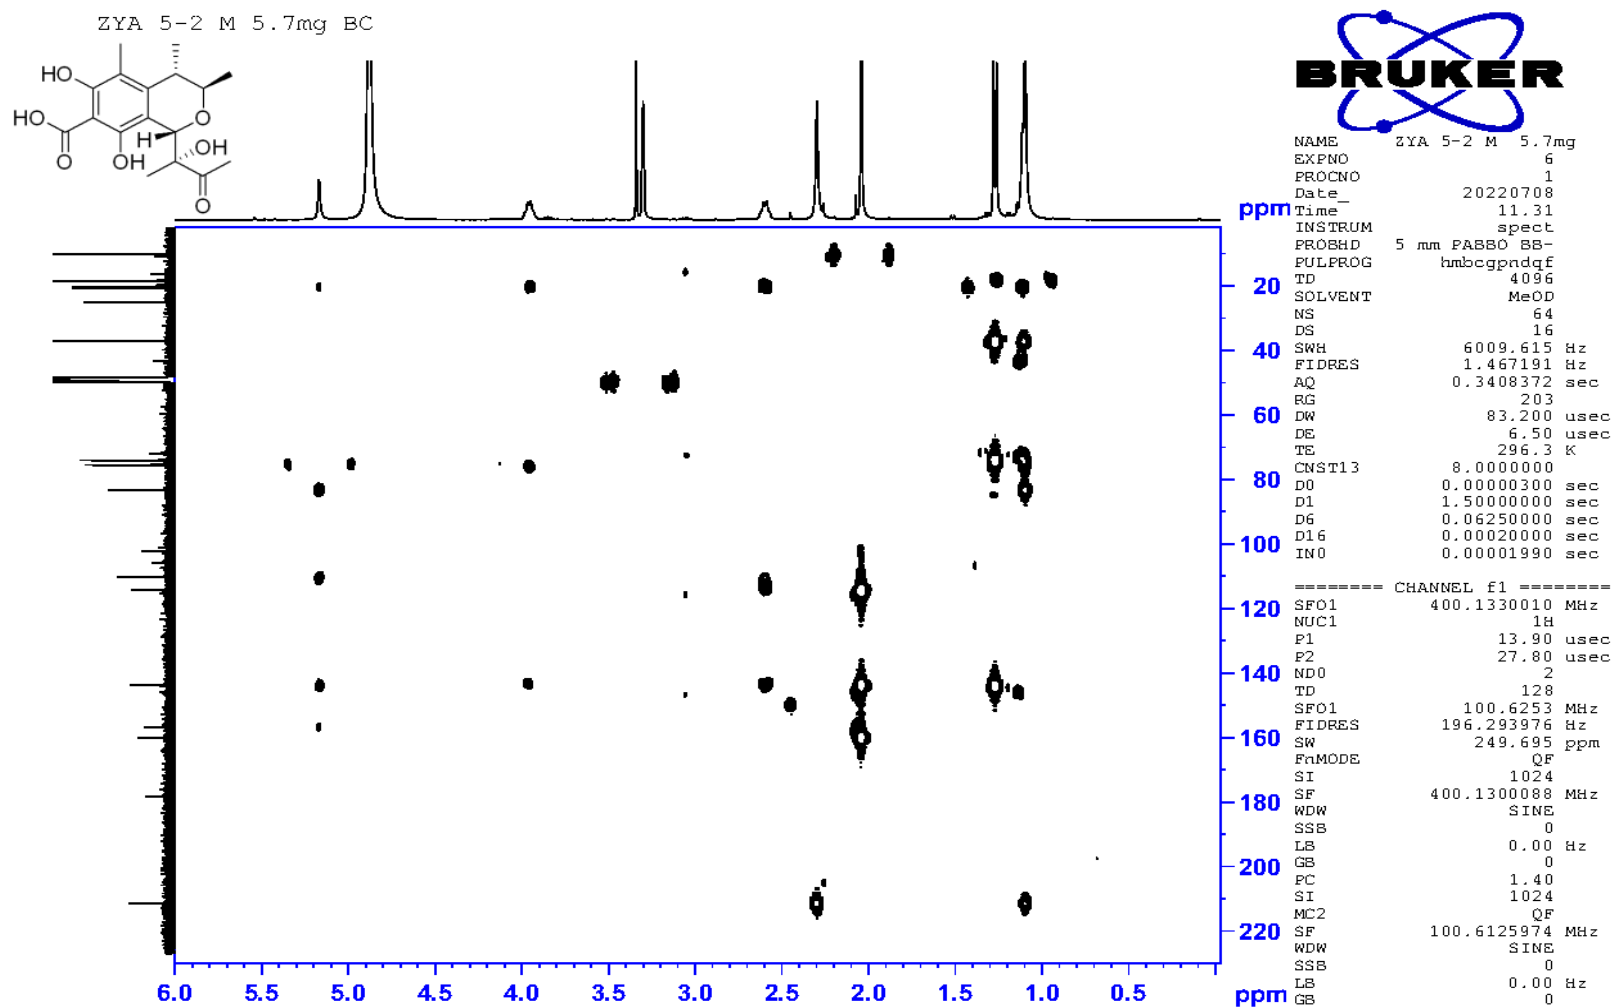

**Figure S6.** The HMBC spectrum of compound **1** in CD<sub>3</sub>OD.

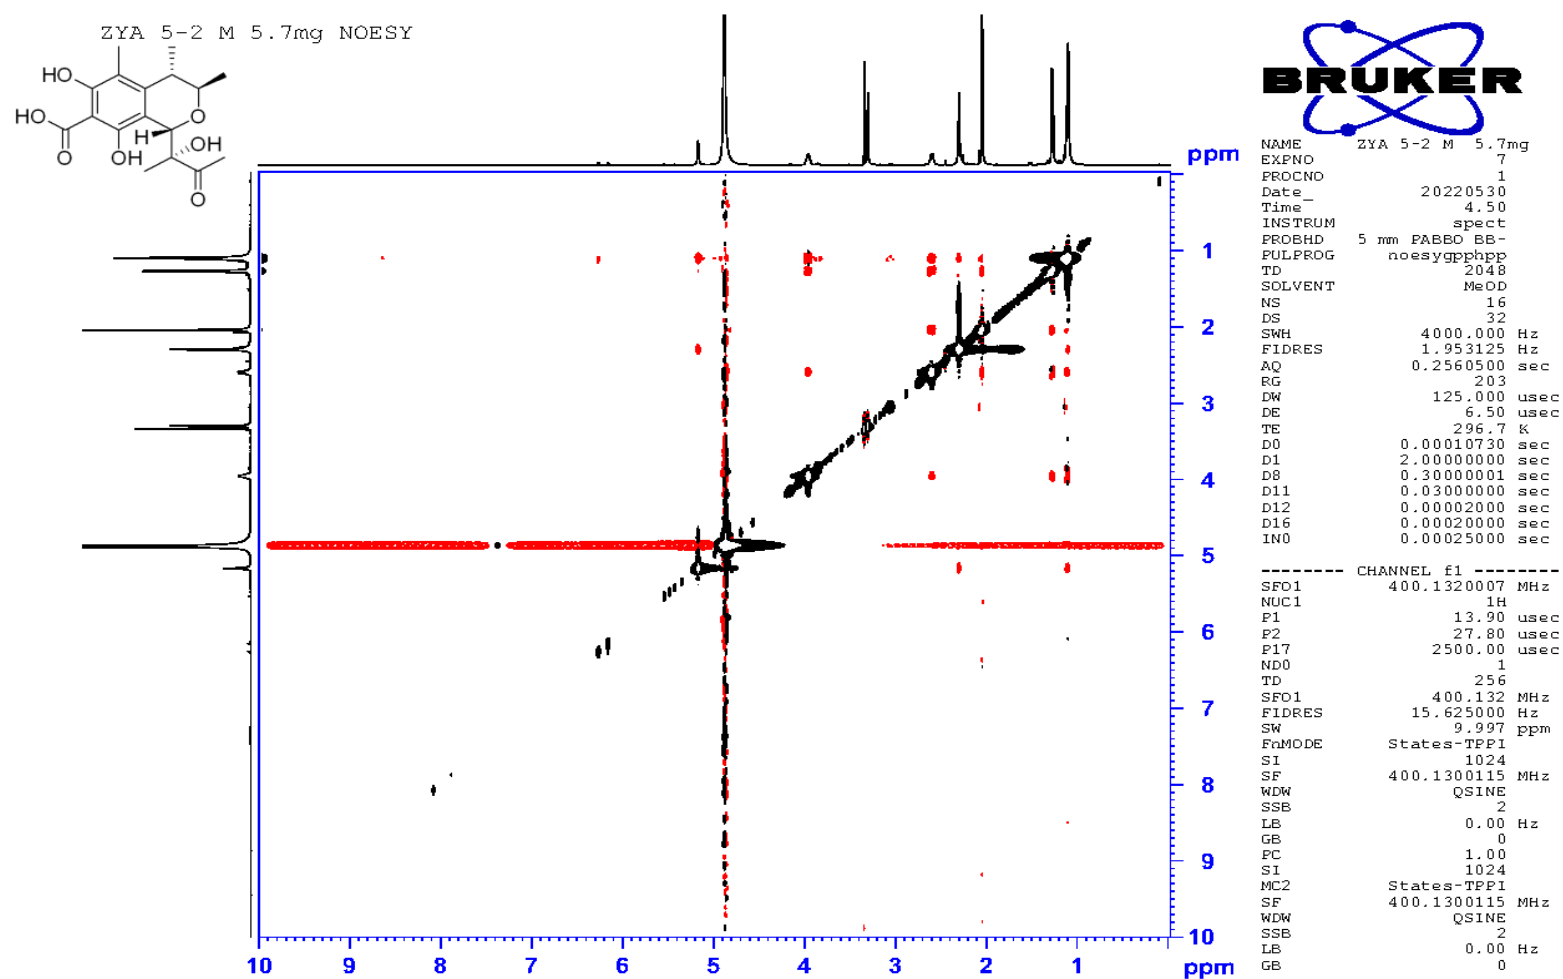

**Figure S7.** The NOESY spectrum of compound **1** in CD<sub>3</sub>OD.



## Elemental Composition Report

Page 1

Tolerance = 50.0 PPM / DBE: min = -1.5, max = 50.0

Element prediction: Off

Number of isotope peaks used for i-FIT = 3

Monoisotopic Mass, Even Electron Ions

83 formula(e) evaluated with 8 results within limits (up to 50 best isotopic matches for each mass)

Elements Used:

C: 5-35 H: 0-60 O: 0-10 <sup>23</sup>Na: 0-1

ZYA 8-3-N 70 (0.290) Cm (70:71)

1: TOF MS ES-

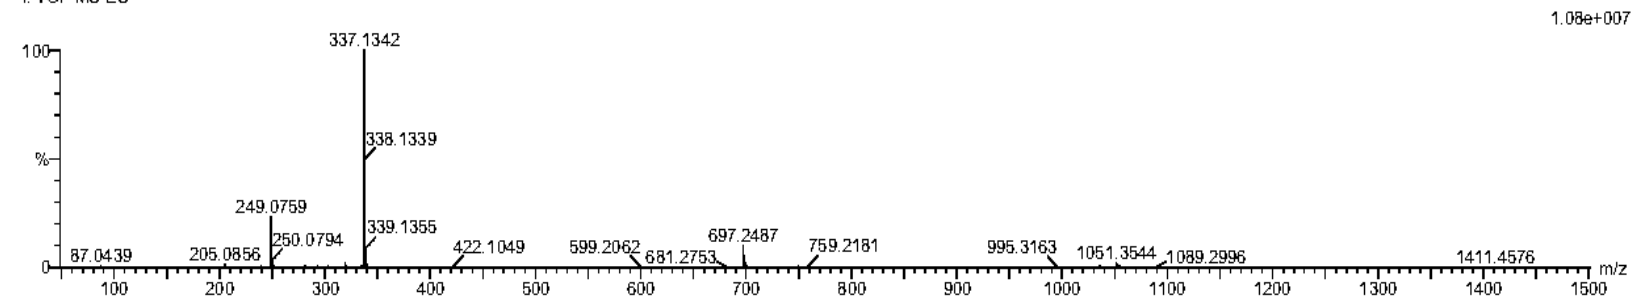

Minimum: 80.00  
Maximum: 100.00

| Mass     | RA     | Calc. Mass | mDa   | PPM   | DBE  | i-FIT  | Norm  | Conf(%) | Formula                     |
|----------|--------|------------|-------|-------|------|--------|-------|---------|-----------------------------|
| 337.1342 | 100.00 | 337.1229   | 11.3  | 33.5  | 16.5 | 1296.8 | 1.570 | 20.81   | C24 H17 O2                  |
|          |        | 337.1440   | -9.8  | -29.1 | 11.5 | 1297.1 | 1.848 | 15.75   | C21 H21 O4                  |
|          |        | 337.1204   | 13.8  | 40.9  | 13.5 | 1297.3 | 1.998 | 13.56   | C22 H18 O2 <sup>23</sup> Na |
|          |        | 337.1287   | 5.5   | 16.3  | 7.5  | 1297.4 | 2.139 | 11.78   | C17 H21 O7                  |
|          |        | 337.1416   | -7.4  | -21.9 | 8.5  | 1297.4 | 2.151 | 11.64   | C19 H22 O4 <sup>23</sup> Na |
|          |        | 337.1499   | -15.7 | -46.6 | 2.5  | 1297.7 | 2.380 | 9.26    | C14 H25 O9                  |
|          |        | 337.1263   | 7.9   | 23.4  | 4.5  | 1297.7 | 2.381 | 9.25    | C15 H22 O7 <sup>23</sup> Na |
|          |        | 337.1475   | -13.3 | -39.5 | -0.5 | 1297.8 | 2.531 | 7.96    | C12 H26 O9 <sup>23</sup> Na |

Figure S8. The HR-ESI-MS of compound 2.

ZYA 8-3 DMSO 1.0mg H

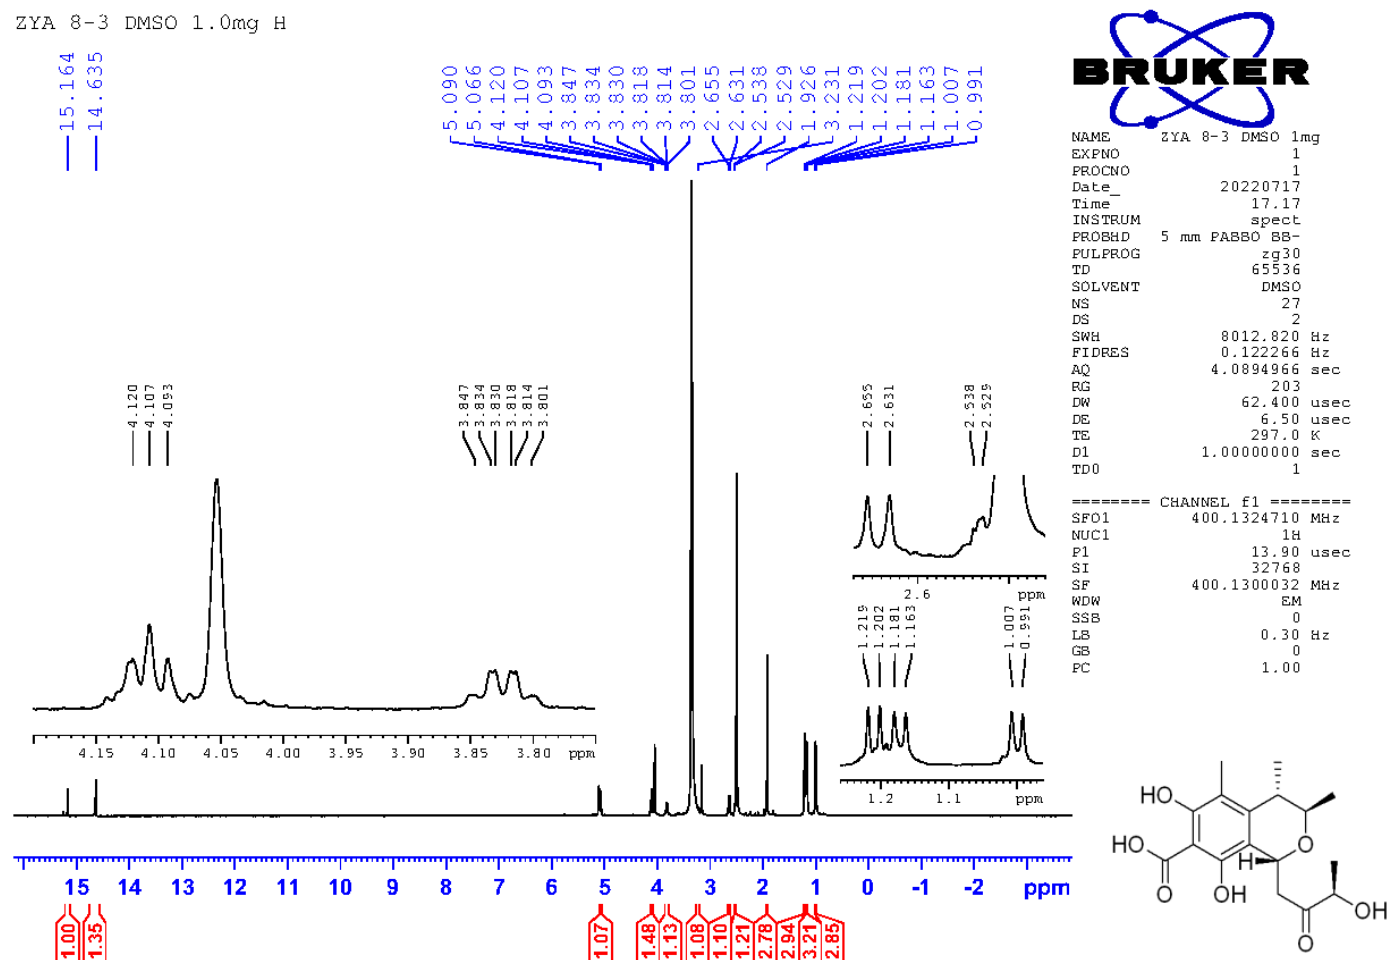

Figure S9. The  $^1\text{H}$  NMR spectrum of compound 2 in  $\text{DMSO-}d_6$ .

ZYA 8-3 DMSO 1.0mg C

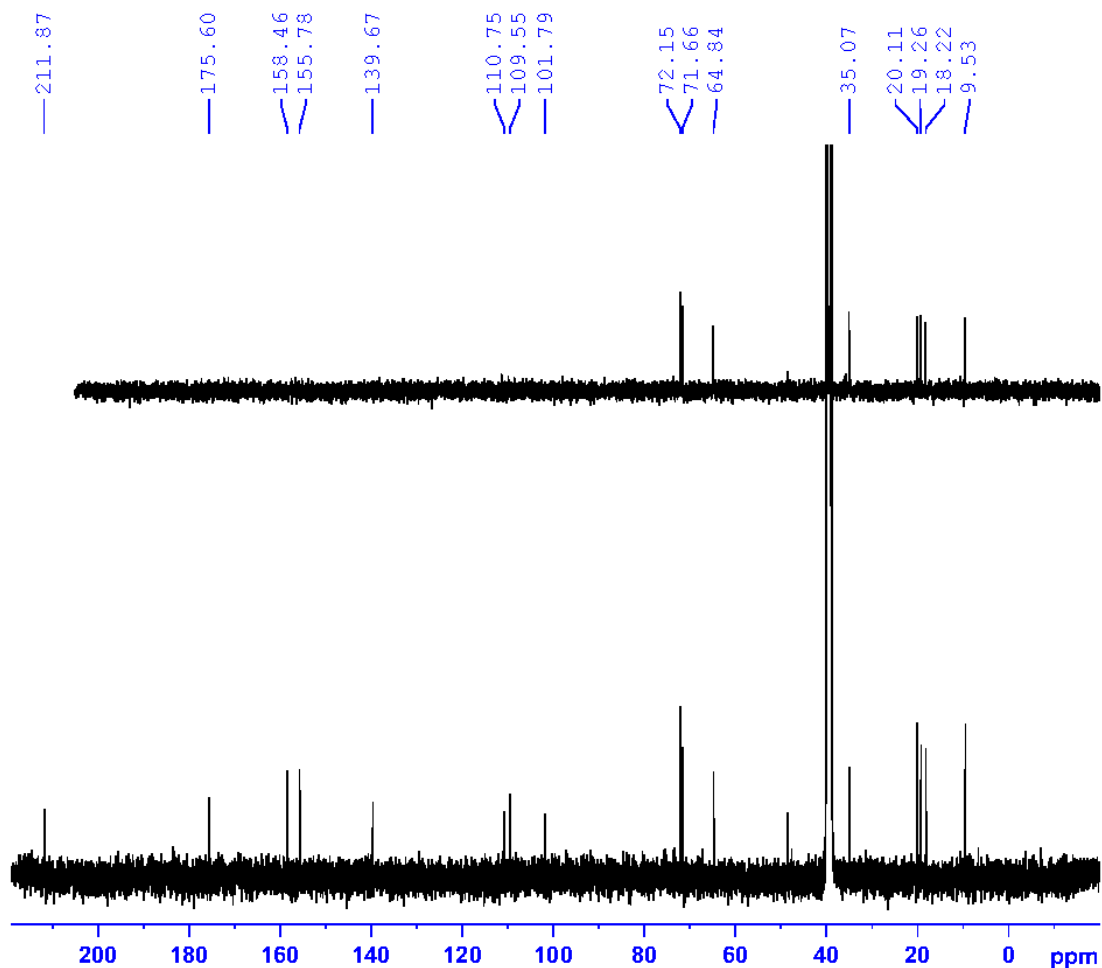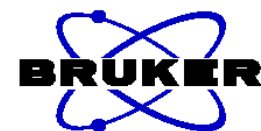

NAME ZYA 8-3 DMSO 1mg  
 EXPNO 2  
 PROCNO 1  
 Date\_ 20220810  
 Time\_ 21.43  
 INSTRUM spect  
 PROSHD 5 mm PABBO BB-  
 PULPROG zgpg30  
 TD 65536  
 SOLVENT DMSO  
 NS 10240  
 DS 4  
 SWH 24038.461 Hz  
 FIDRES 0.366798 Hz  
 AQ 1.3631988 sec  
 RG 203  
 DW 20.800 usec  
 DE 6.50 usec  
 TE 297.3 K  
 D1 2.00000000 sec  
 D11 0.03000000 sec  
 TD0 1

===== CHANNEL f1 =====  
 SFO1 100.6228298 MHz  
 NUC1 13C  
 P1 12.37 usec  
 SI 32768  
 SF 100.6128152 MHz  
 WDW EM  
 SSB 0  
 LB 1.00 Hz  
 GB 0  
 PC 1.40

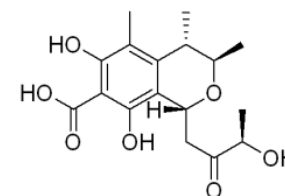

Figure S10. The  $^{13}\text{C}$  NMR spectrum of compound **2** in  $\text{DMSO}-d_6$ .

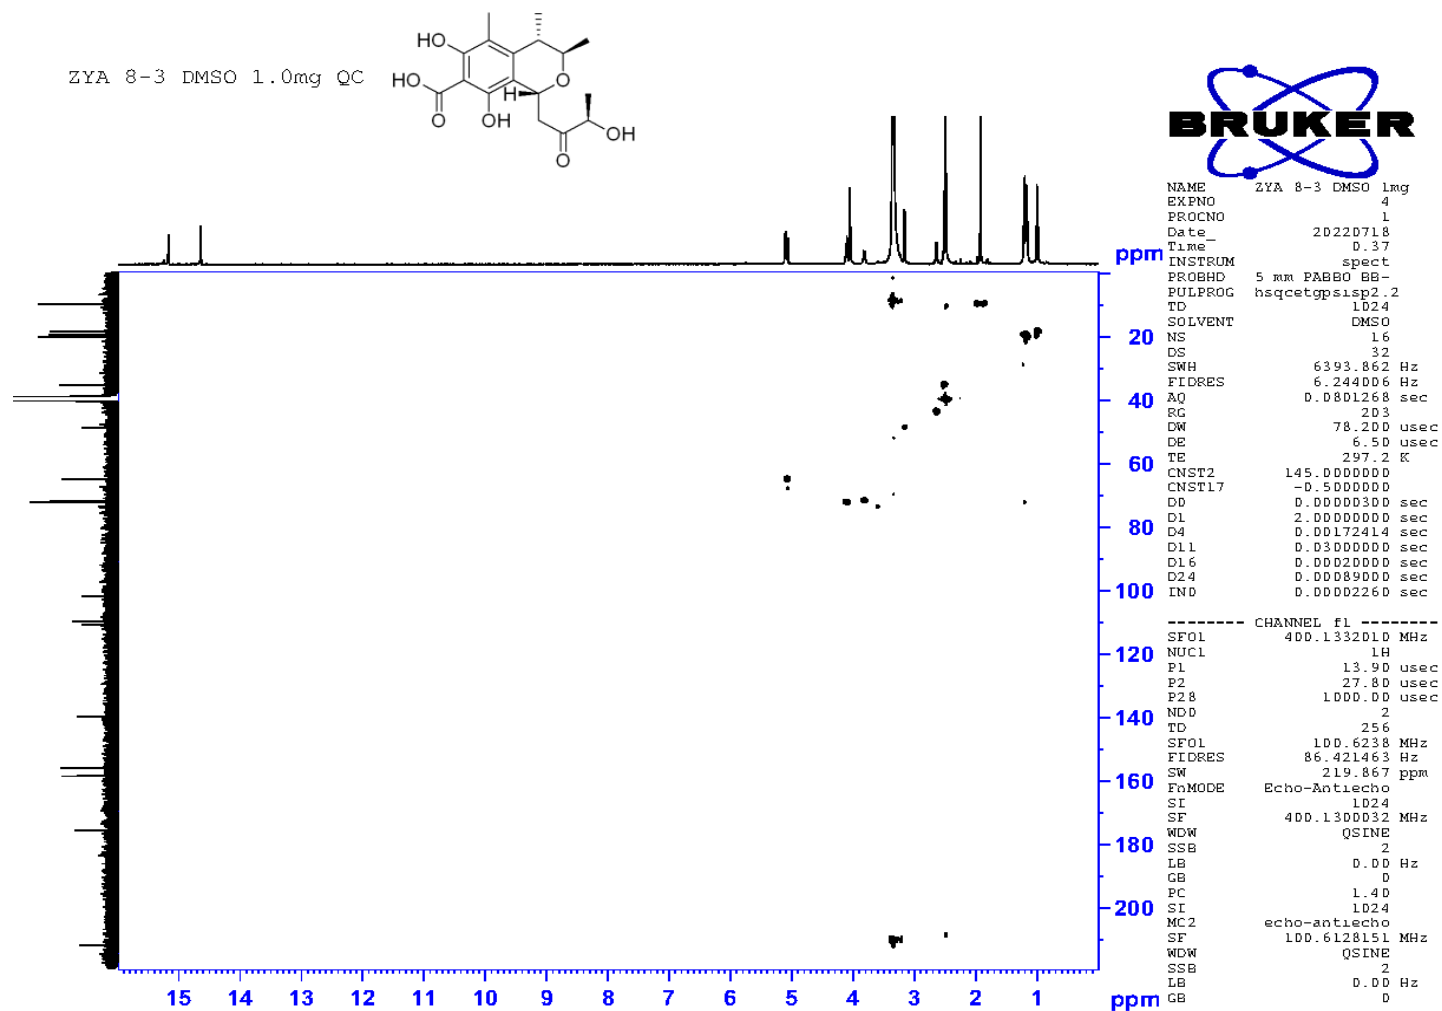

**Figure S11.** The HSQC spectrum of compound **2** in DMSO-*d*<sub>6</sub>.

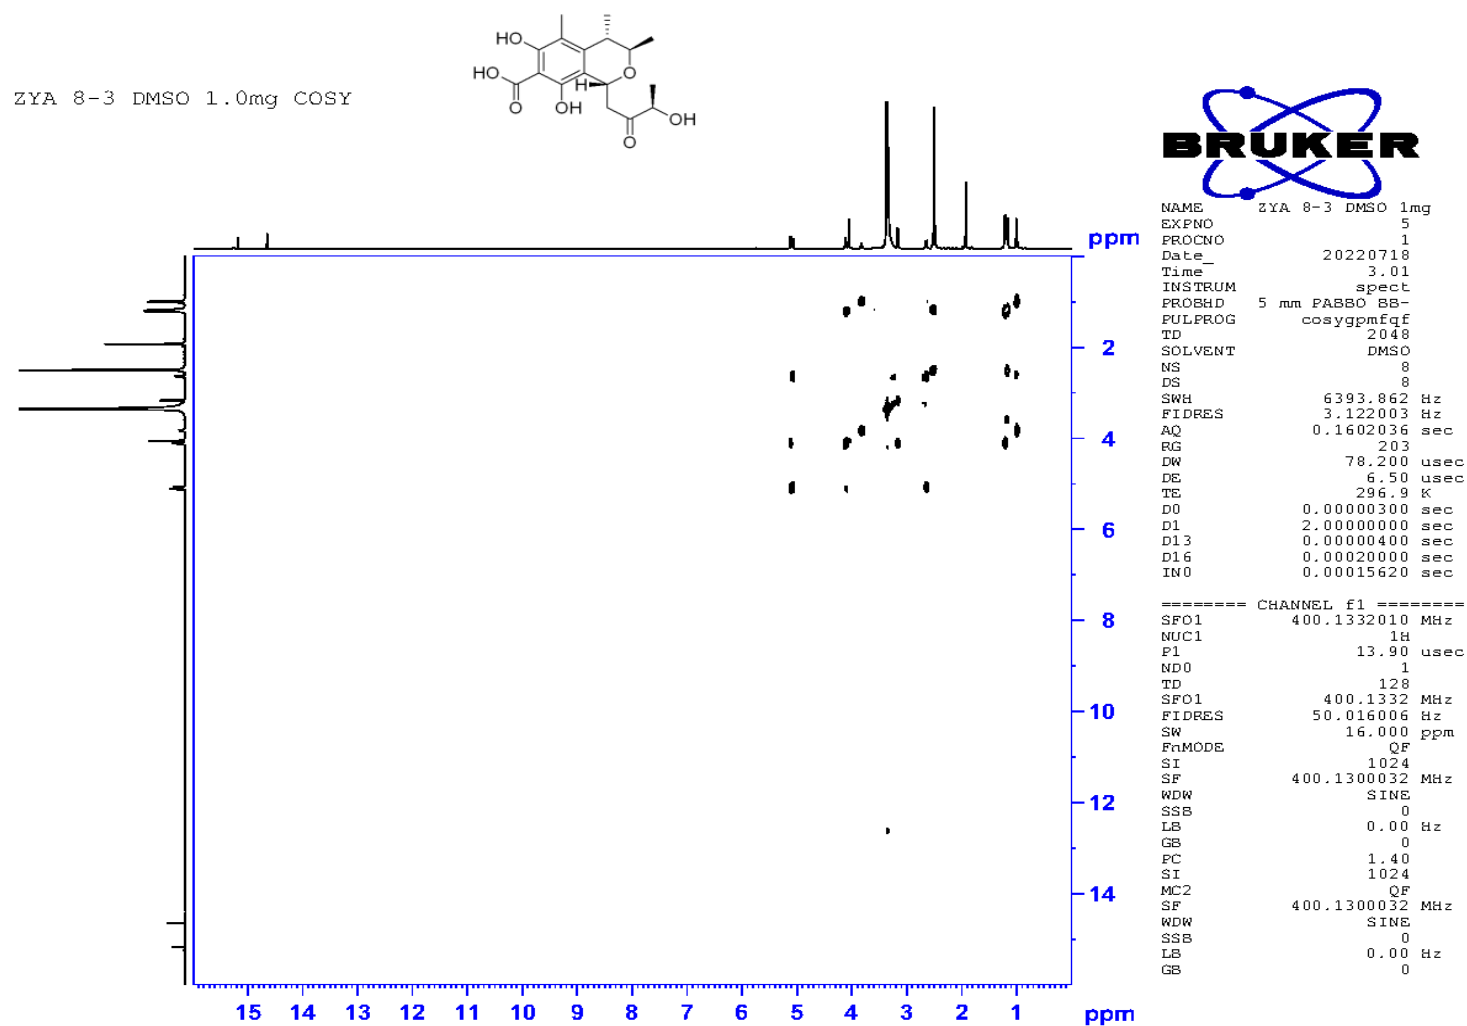

Figure S12. The  $^1\text{H}$ - $^1\text{H}$  COSY spectrum of compound **2** in DMSO- $d_6$ .

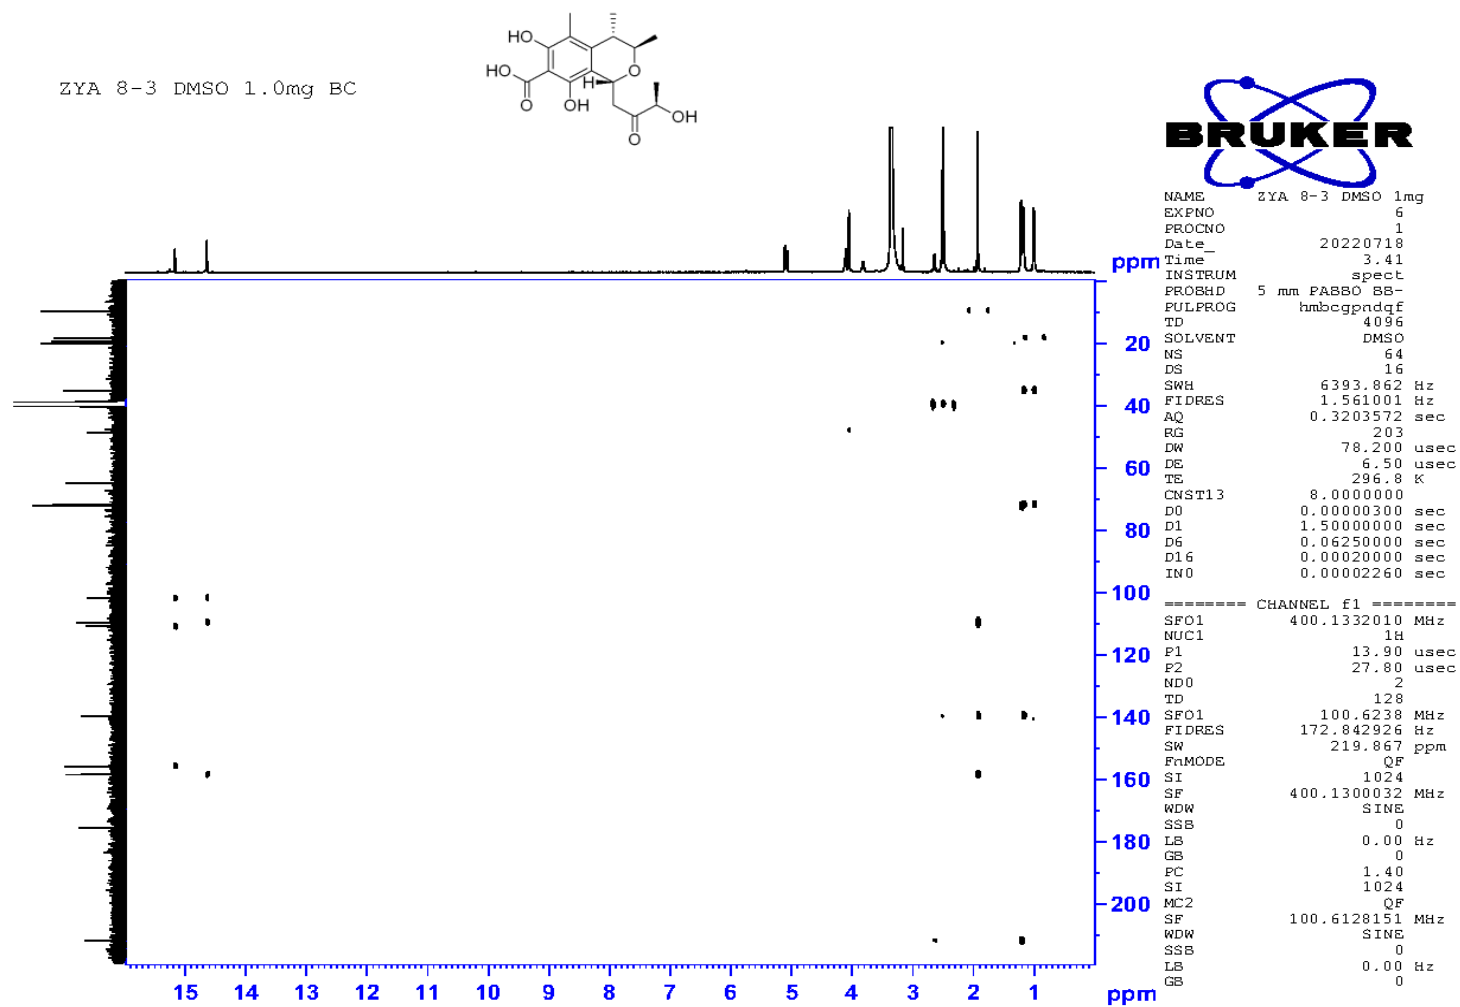

**Figure S13.** The HMBC spectrum of compound **2** in DMSO- $d_6$ .

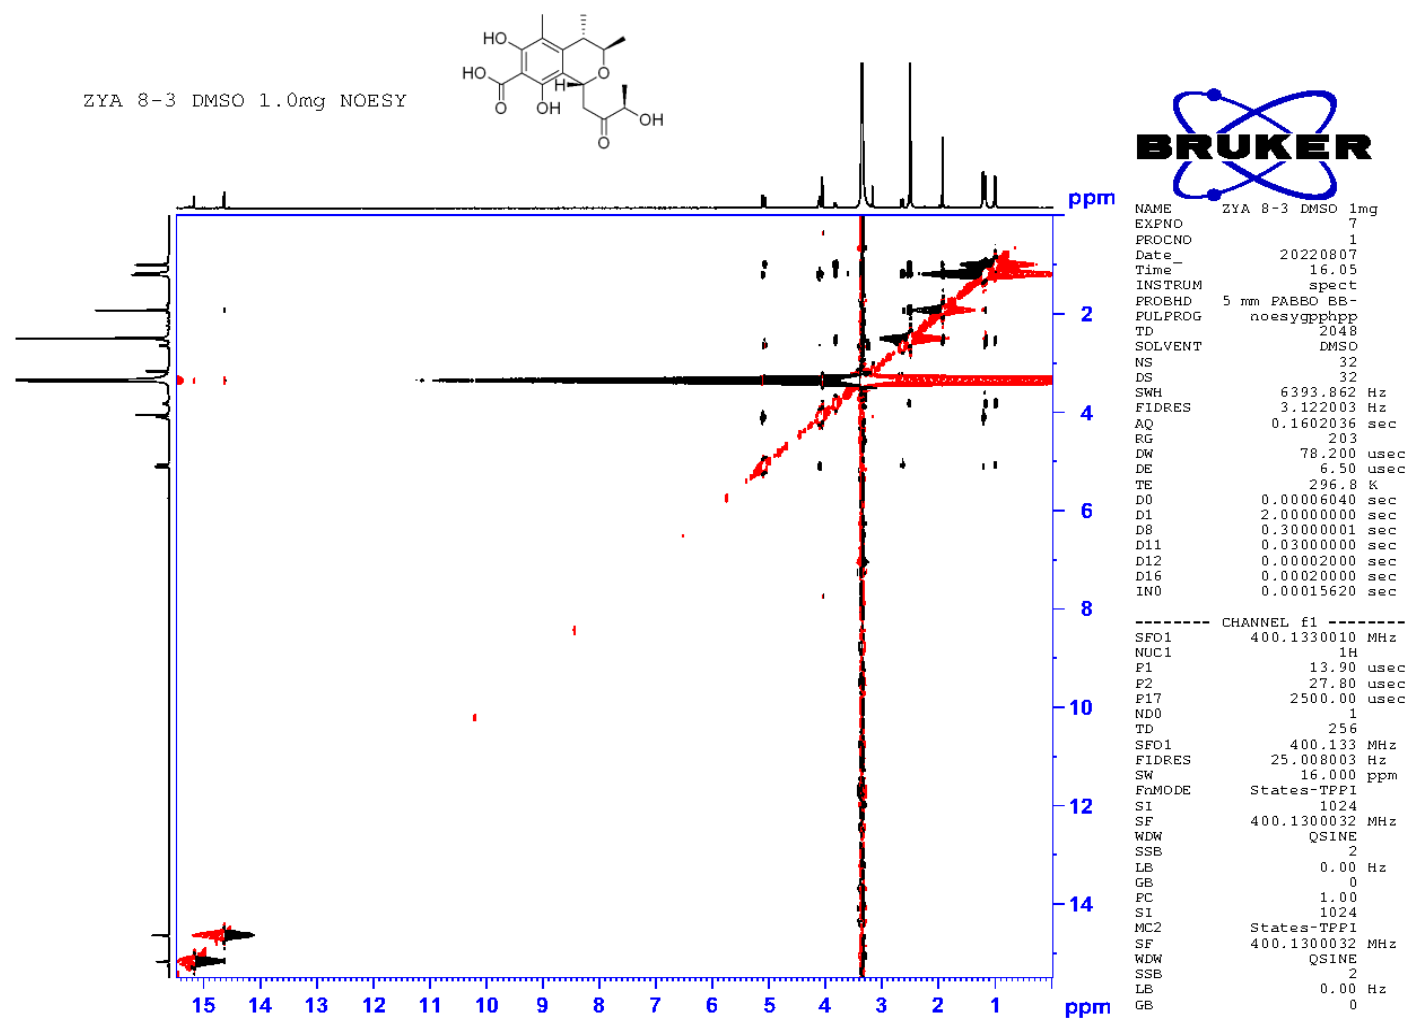

**Figure S14.** The NOESY spectrum of compound **2** in DMSO- $d_6$ .

## Elemental Composition Report

Page 1

Tolerance = 5.0 mDa / DBE: min = -1.5, max = 50.0

Element prediction: Off

Number of isotope peaks used for i-FIT = 3

Monoisotopic Mass, Even Electron Ions

105 formula(e) evaluated with 2 results within limits (up to 50 best isotopic matches for each mass)

Elements Used:

C: 0-35 H: 0-50 O: 0-15 <sup>23</sup>Na: 0-1

ZYA 8-4-N 70 (0.290) Cm (63:89)

1: TOF MS ES-

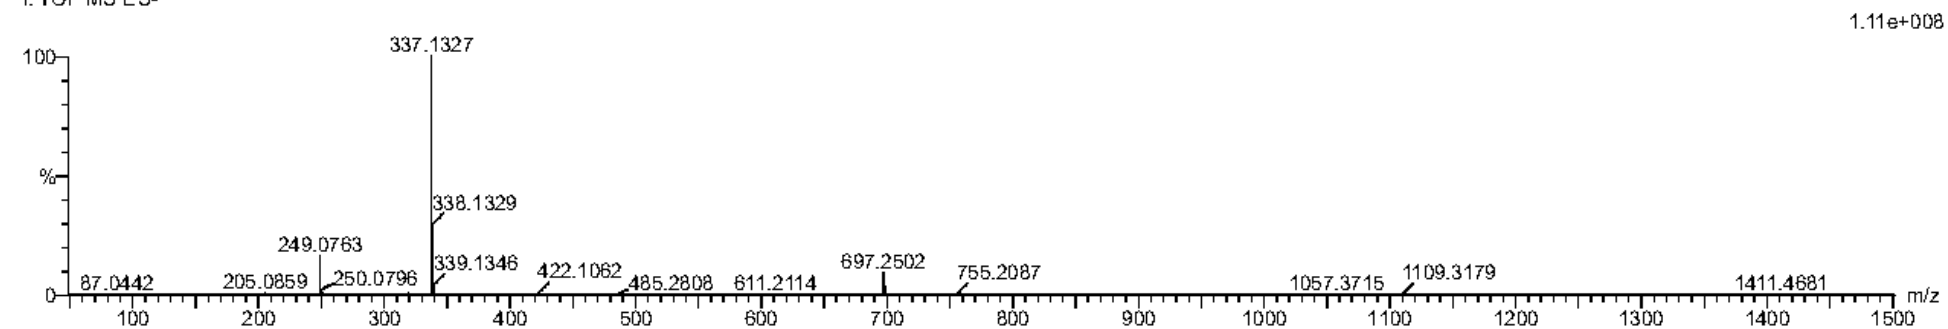

Minimum: 80.00  
Maximum: 100.00

| Mass     | RA     | Calc. Mass | mDa  | PPM  | DBE  | i-FIT  | Norm  | Conf (%) | Formula     |
|----------|--------|------------|------|------|------|--------|-------|----------|-------------|
| 337.1327 | 100.00 | 337.1287   | 4.0  | 11.9 | 7.5  | 2032.0 | 0.148 | 86.21    | C17 H21 O7  |
|          |        | 337.1346   | -1.9 | -5.6 | -1.5 | 2033.8 | 1.981 | 13.79    | C10 H25 O12 |

**Figure S15.** The HR-ESI-MS of compound **3**.



ZYA 8-4 DMSO 1mg H

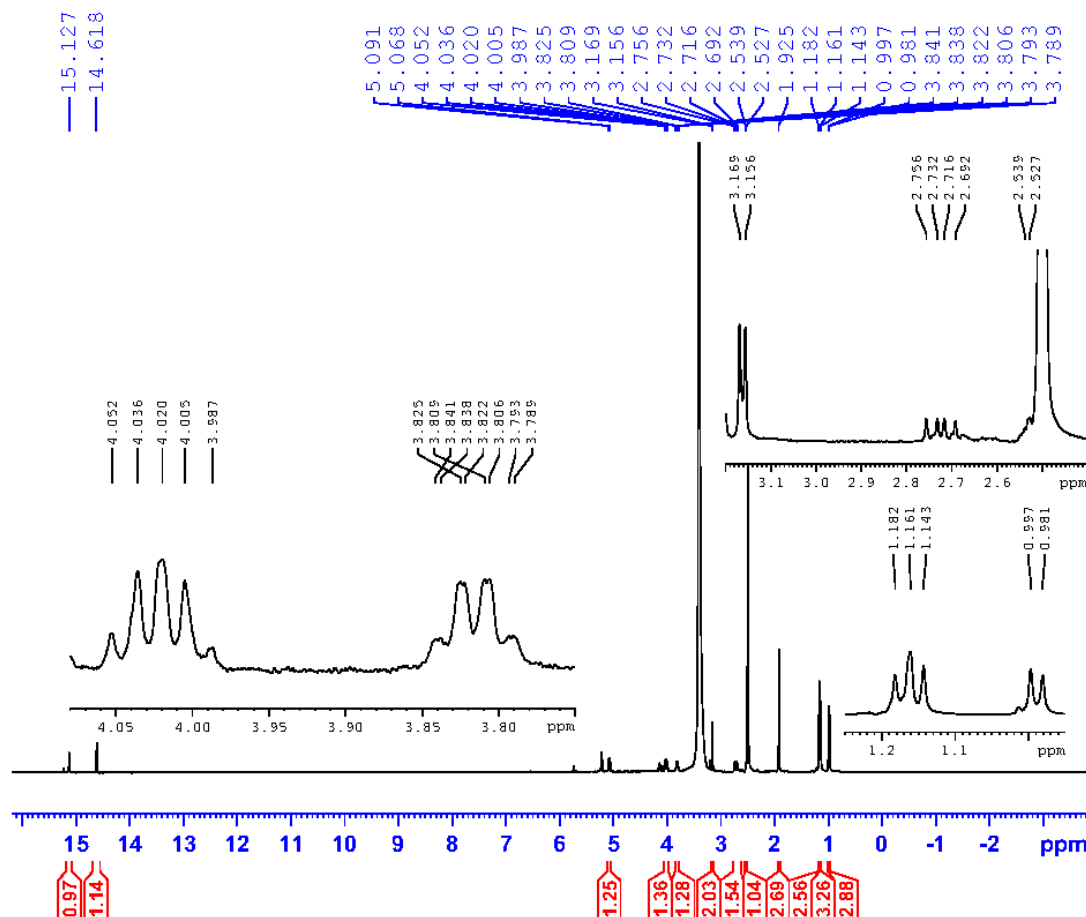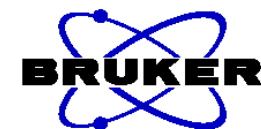

NAME ZYA 8-4 DMSO 1mg  
EXPNO 1  
PROCNO 1  
Date\_ 20220508  
Time\_ 22.03  
INSTRUM spect  
PROBHD 5 mm PABBO BB-  
PULPROG zg30  
TD 65536  
SOLVENT DMSO  
NS 19  
DS 2  
SWH 8012.820 Hz  
FIDRES 0.122266 Hz  
AQ 4.0894966 sec  
RG 161  
DW 62.400 usec  
DE 6.50 usec  
TE 296.7 K  
D1 1.00000000 sec  
TD0 1

===== CHANNEL f1 =====  
SF01 400.1324710 MHz  
NUC1 1H  
P1 13.90 usec  
SI 32768  
SF 400.1300034 MHz  
WDW EM  
SSB 0  
LB 0.30 Hz  
GB 0  
PC 1.00

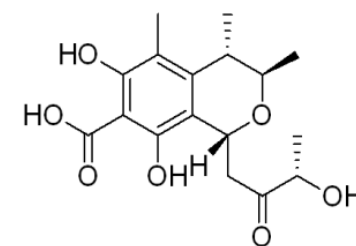

Figure S16. The  $^1\text{H}$  NMR spectrum of compound **3** in  $\text{DMSO}-d_6$ .

ZYA 8-4 DMSO 1mg C

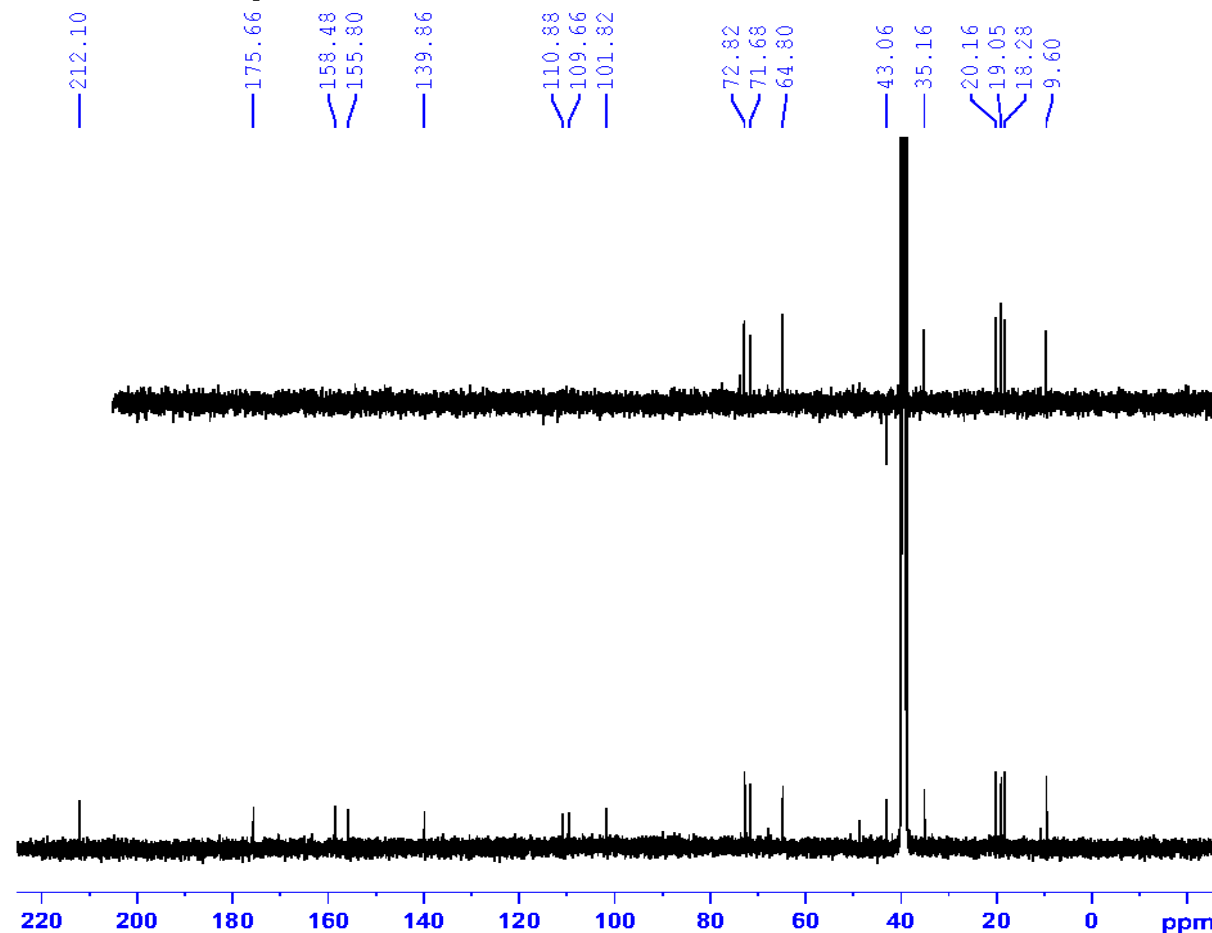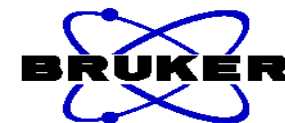

NAME ZYA 8-4 DMSO 1mg  
EXPNO 2  
PROCNO 1  
Date\_ 20220511  
Time\_ 22.16  
INSTRUM spect  
PROBHD 5 mm PABBO BB-  
PULPROG zgpg30  
TD 65536  
SOLVENT DMSO  
NS 10240  
DS 4  
SWH 25252.525 Hz  
FIDRES 0.385323 Hz  
AQ 1.2976629 sec  
RG 203  
DW 19.800 usec  
DE 6.50 usec  
TE 296.9 K  
D1 2.00000000 sec  
D11 0.03000000 sec  
TD0 1

===== CHANNEL f1 =====  
SF01 100.6228298 MHz  
NUC1 13C  
P1 12.37 usec  
SI 32768  
SF 100.6128091 MHz  
WDW EM  
SSB 0  
LB 1.00 Hz  
GB 0  
PC 1.40

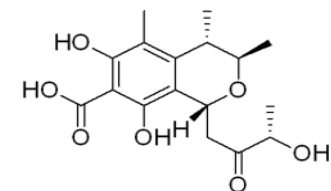

Figure S17. The  $^{13}\text{C}$  NMR spectrum of compound **3** in  $\text{DMSO}-d_6$ .

CC1=C(C(=C(C=C1)O)C(=O)O)O[C@H]2C[C@@H](C[C@H](O)C(=O)O)[C@H](O)[C@H]2O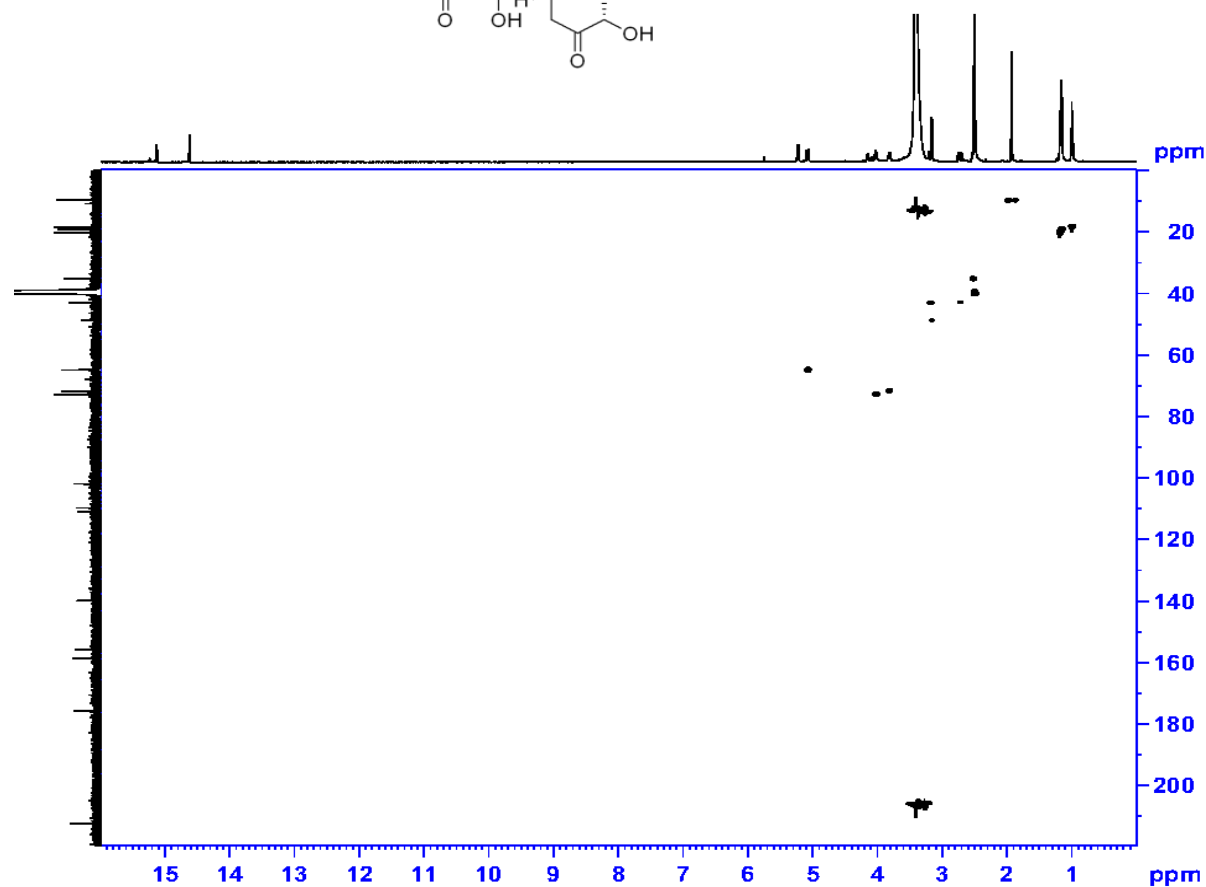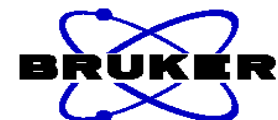

|         |                 |      |     |
|---------|-----------------|------|-----|
| NAME    | ZYA 8-4         | DMSO | lmg |
| EXPNO   |                 | 4    |     |
| PROCNO  |                 | 1    |     |
| Date_   | 20220703        |      |     |
| Time_   | 11.24           |      |     |
| INSTRUM | spect           |      |     |
| PROBHD  | 5 mm PABBO BB-  |      |     |
| PULPROG | hsqcetgps1sp2.2 |      |     |
| TD      | 1024            |      |     |
| SOLVENT | DMSO            |      |     |
| NS      | 16              |      |     |
| DS      | 32              |      |     |
| SWH     | 8012.820        | Hz   |     |
| FIDRES  | 7.825020        | Hz   |     |
| AQ      | 0.0639476       | sec  |     |
| RG      | 203             |      |     |
| DW      | 62.400          | usec |     |
| DE      | 6.50            | usec |     |
| TE      | 296.7           | K    |     |
| CNST2   | 145.0000000     |      |     |
| CNST17  | -0.5000000      |      |     |
| D0      | 0.00000300      | sec  |     |
| D1      | 2.00000000      | sec  |     |
| D4      | 0.00172410      | sec  |     |
| D11     | 0.03000000      | sec  |     |
| D16     | 0.00020000      | sec  |     |
| D24     | 0.00089000      | sec  |     |
| INO     | 0.00002260      | sec  |     |

```

----- CHANNEL f1 -----
SF01      400.1340013 MHz
NUCL1      1H
P1         13.90 usec
P2         27.80 usec
P28        1000.00 usec
ND0        2
TD         256
SF01      100.6238 MHz
FIDRES     86.421463 Hz
SW        219.867 ppm
FnMODE     Echo-Antiecho
SI         1024
SF        400.1300035 MHz
WDW        QSiNE
SSB        2
LB         0.00 Hz
GB         0
PC         1.40
SI         1024
MC2        echo-antiecho
SF        100.6128000 MHz
WDW        QSiNE
SSB        2
LB         0.00 Hz
GB         0

```

**Figure S18.** The HSQC spectrum of compound **3** in DMSO-*d*<sub>6</sub>.

ZYA 8-4 DMSO 1mg COSY

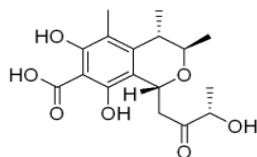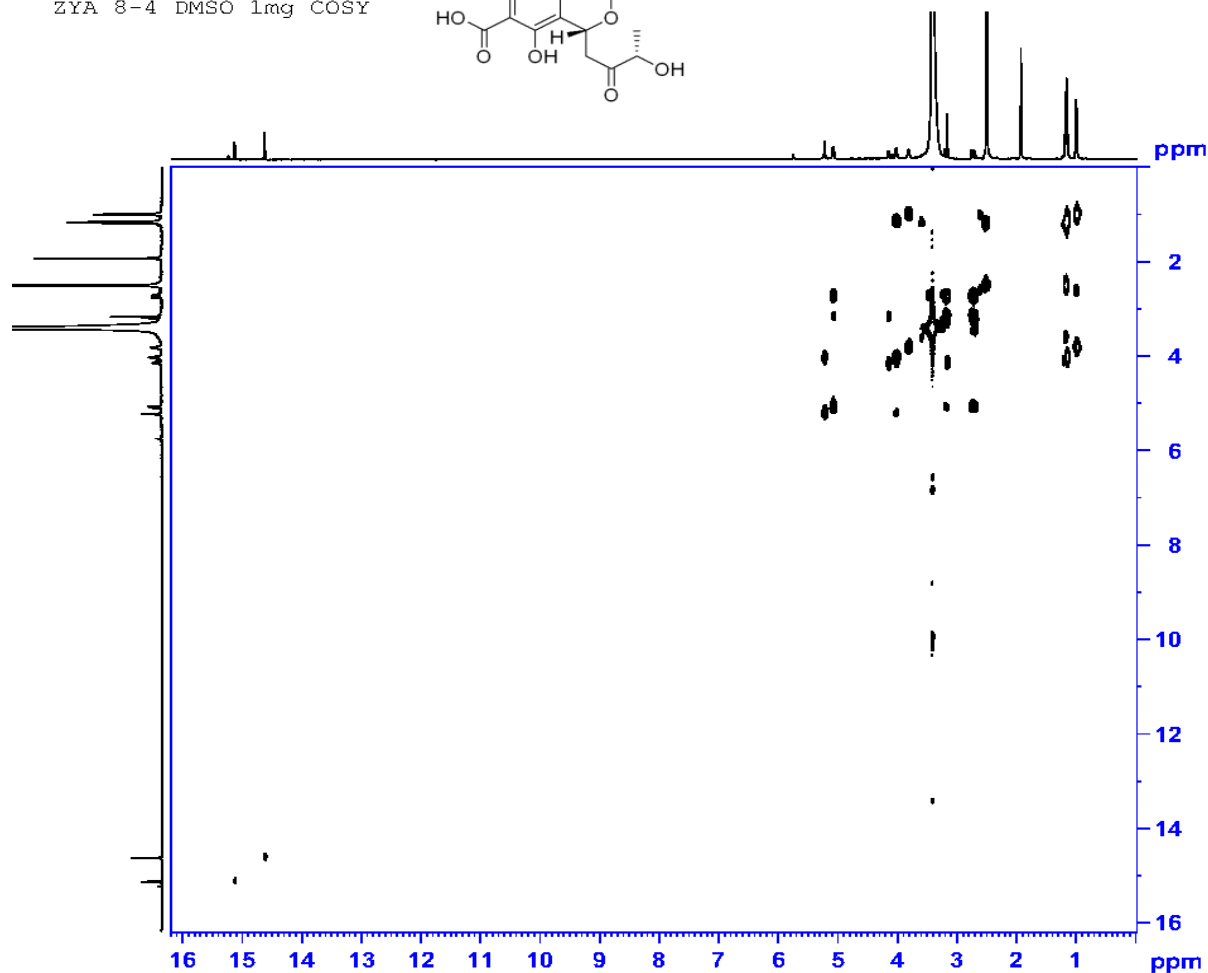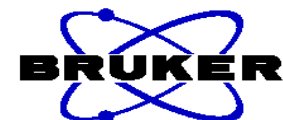

NAME ZYA 8-4 DMSO 1mg  
EXPNO 5  
PROCNO 1  
Date\_ 20220703  
Time 13.49  
INSTRUM spect  
PROBHD 5 mm PABBO BB-  
PULPROG cosygpmfzf  
TD 2048  
SOLVENT DMSO  
NS 64  
DS 8  
SWH 8012.820 Hz  
FIDRES 3.912510 Hz  
AQ 0.1278452 sec  
RG 203  
DW 62.400 usec  
DE 6.50 usec  
TE 296.7 K  
D0 0.00000300 sec  
D1 2.00000000 sec  
D13 0.00000400 sec  
D16 0.00020000 sec  
IN0 0.00012500 sec

===== CHANNEL f1 =====  
SFO1 400.1340013 MHz  
NUC1 1H  
P1 13.90 usec  
ND0 1  
TD 128  
SFO1 400.134 MHz  
FIDRES 62.500000 Hz  
SW 19.993 ppm  
FMODE QF  
SI 1024  
SF 400.1300035 MHz  
WDW SINE  
SSB 0  
LB 0.00 Hz  
GB 0  
PC 1.40  
SI 1024  
MC2 QF  
SF 400.1300035 MHz  
WDW SINE  
SSB 0  
LB 0.00 Hz  
GB 0

Figure S19. The  $^1\text{H}$ - $^1\text{H}$  COSY spectrum of compound **3** in  $\text{DMSO-}d_6$ .

ZYA 8-4 DMSO 1mg BC

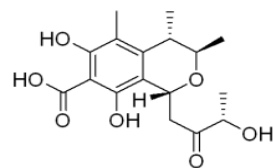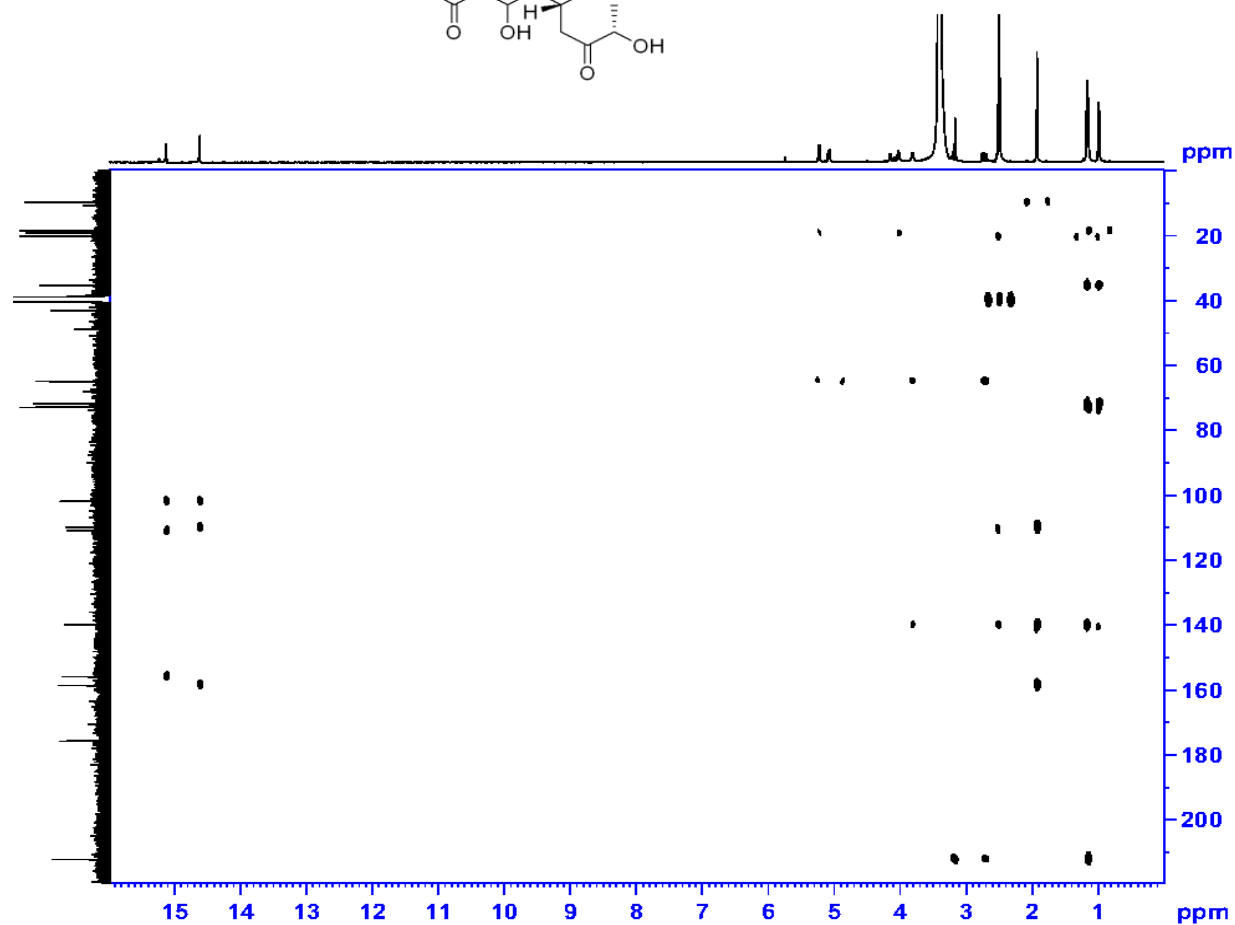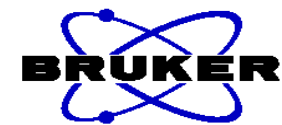

```

NAME      ZYA 8-4 DMSO 1mg
EXPNO     6
PROCNO    1
Date_     20220703
Time      18.42
INSTRUM    spect
PROBHD     5 mm PABBO BB-
PULPROG    hmbcgpndqf
TD         4096
SOLVENT    DMSO
NS         64
DS         16
SWH         8012.820 Hz
FIDRES     1.956255 Hz
AQ         0.2556404 sec
RG         203
DW         62.400 usec
DE         6.50 usec
TE         296.6 K
CNST13     8.0000000
D0         0.00000300 sec
D1         1.50000000 sec
D6         0.06250000 sec
D16        0.00020000 sec
IN0        0.00002260 sec

===== CHANNEL f1 =====
SF01      400.1340013 MHz
NUC1       1H
P1         13.90 usec
P2         27.80 usec
ND0        2
TD         128
SF01      100.6238 MHz
FIDRES     172.842926 Hz
SW         219.867 ppm
F0MODE     QF
SI         1024
SF         400.1300035 MHz
WDW        SINE
SSB        0
LB         0.00 Hz
GB         0
PC         1.40
SI         1024
MC2        QF
SF         100.6128090 MHz
WDW        SINE
SSB        0
LB         0.00 Hz
GB         0
  
```

Figure S20. The HMBC spectrum of compound **3** in DMSO-*d*<sub>6</sub>.

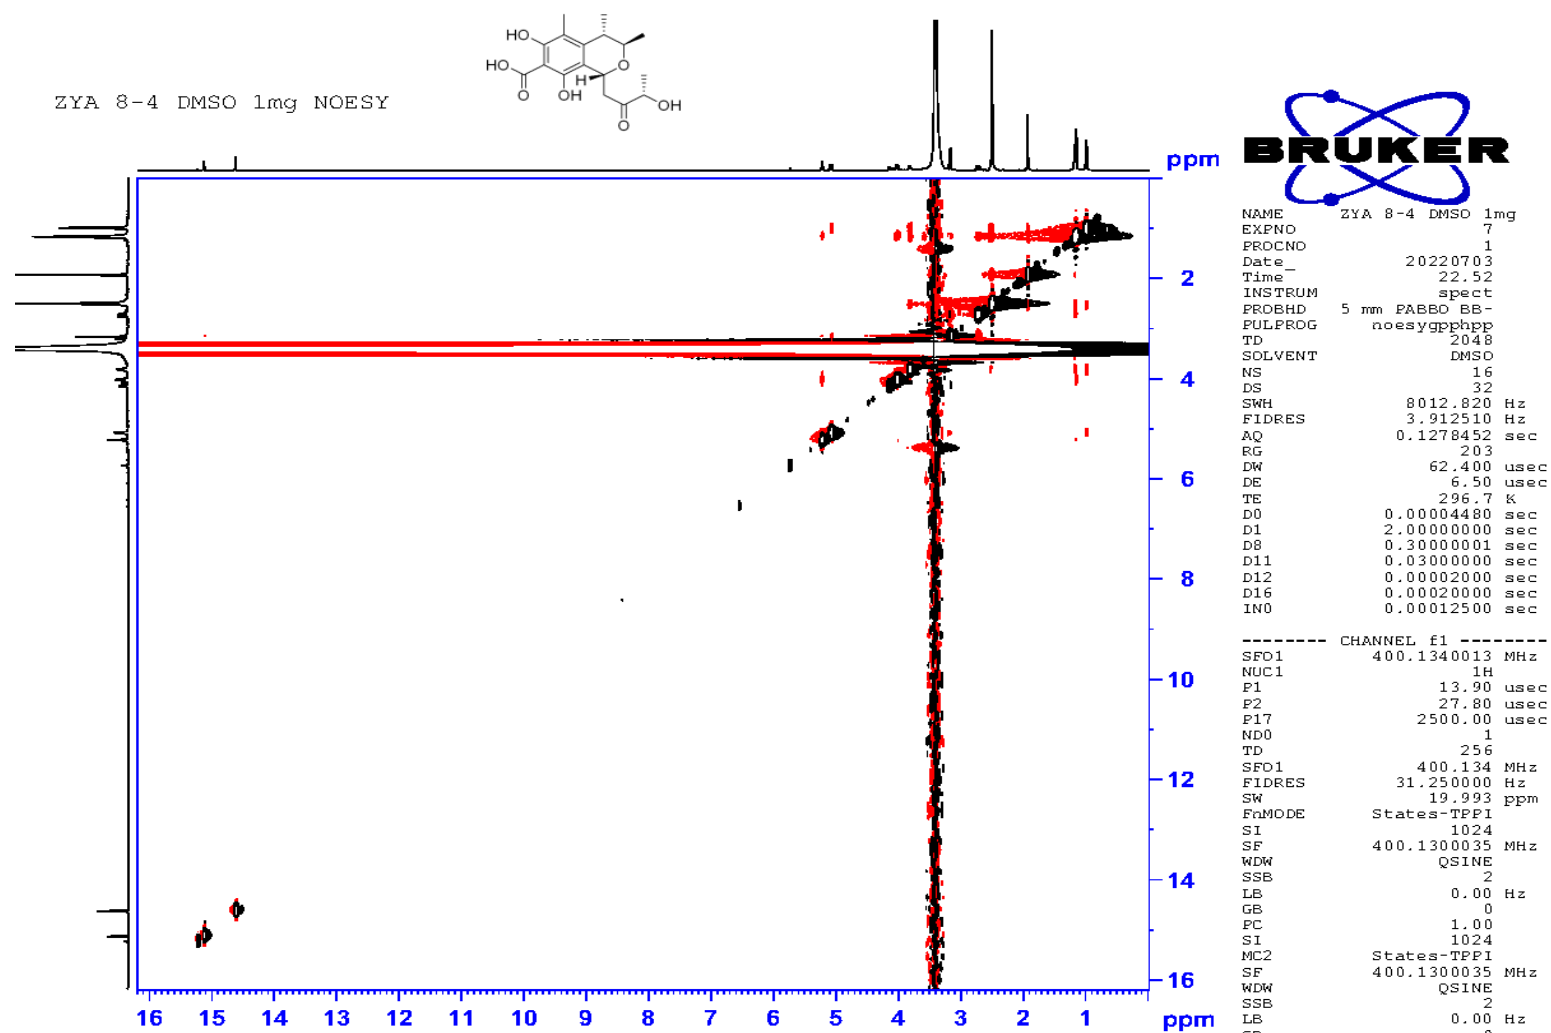

Figure S21. The NOESY spectrum of compound 3 in DMSO- $d_6$ .
